# Supplementary material for: Reconstructing landscapes: an adjoint model of the stream power and diffusion erosion equation
Source: Copernicus journal article supplement (doi:10.5194/esurf-13-1263-2025), 2025-12-03
Supplement: Supplementary file 1 [file esurf-13-1263-2025-supplement.pdf]

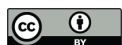

## *Supplement of*

# **Reconstructing landscapes: an adjoint model of the stream power and diffusion erosion equation**

**Carole Petit et al.**

*Correspondence to:* Carole Petit ([carole.petit@univ-cotedazur.fr](mailto:carole.petit@univ-cotedazur.fr))

The copyright of individual parts of the supplement might differ from the article licence.

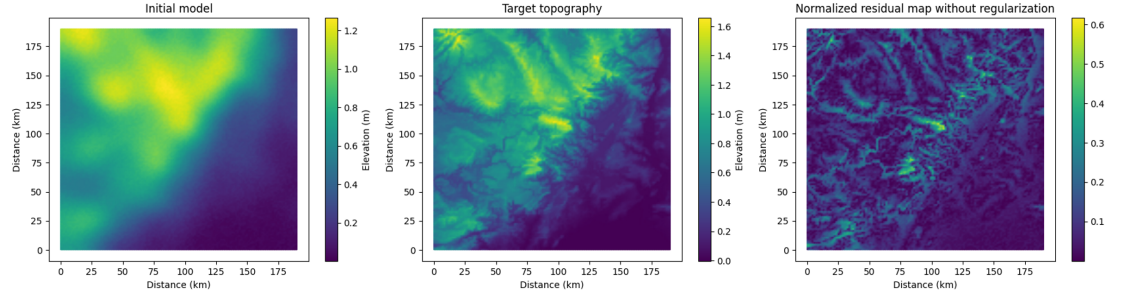

Figure S1: Examples chosen to illustrate the effect of Total Variation coefficient  $\alpha$  and edge preserving coefficient  $k$  (see Table S1). Left: smoothed initial topography; Middle: target (true) topography; Right: residual without any regularization

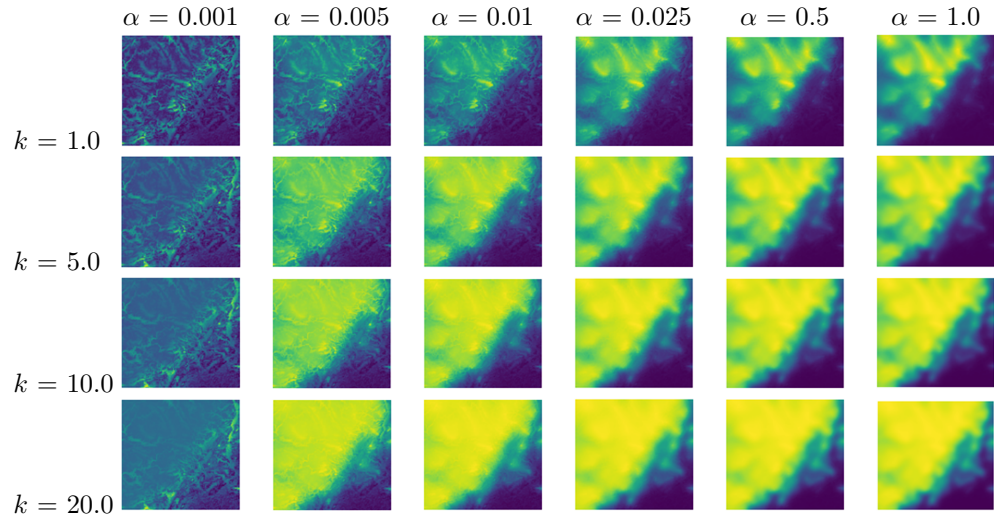

Table S1: Effect of Total Variation coefficient  $\alpha$  and edge preserving coefficient  $k$  on the residual map between a smoothed initial topography and the actual one (Figure S1). Note that increasing  $\alpha$  removes short wavelength variations, while increasing  $k$  tends to gather areas of similar altitudes together. During the inversion process, the yellow areas will be smoothed while the blue ones will be preserved.
